# Supplementary material
Source: publisher site journal article supplement (https://www.dovepress.com/article/617852)
Supplement: Supplementary file 1 [file 617852%20Supplementary%20Material_1.docx]

**Supplementary Material**

**Manuscript ID: 617852**

*Development and Validation of an Interpretable Machine Learning Model Based on Peripheral Blood Biomarkers for Esophageal Cancer Risk Prediction*

**Supplementary Methods**

The revision analysis rebuilt the machine-learning workflow using origindata.xlsx and the nine predictors reported in the manuscript: SIRI, MLR, AST, ADA, CREA, UA, K, PT, and TT. The cohort was stratified into 319 training and 135 internal test observations using random seed 123. Hyperparameter tuning used 10-fold grid search optimizing AUC. Class-based metrics used a fixed probability threshold of 0.50.

Because no center, hospital, site, source, or institution field was present in the available dataset, leave-one-center external validation could not be performed. Repeated stratified cross-validation and stage-restricted analyses were therefore added as internal robustness checks, not as substitutes for true external validation. These supplementary analyses were performed as an independent reproducibility re-run of the full pipeline using a fixed random seed (123) and 10-fold cross-validation for hyperparameter tuning. Because of stochastic elements inherent to the workflow—including the random train–test partition, fold assignment, and model initialization—the resulting metrics differ slightly from those reported in the main text (for example, the random forest internal-test AUC was 0.979 here versus 0.973 in the main analysis). These differences are minor, and the relative ranking of the models and of the leading predictors was unchanged, indicating that the findings are stable across re-runs rather than dependent on a single data split.

**Table S1. Hyperparameter search grids and final model configurations.**

**Table S1A. Logistic.**

| **Field** | **Details** |
| --- | --- |
| Tuning method | Fixed logistic regression configuration |
| Search grid | No grid search; logistic regression fitted with fixed configuration. |
| Best parameters from grid | {} |
| Final fitted configuration | {"C": 1.0, "random_state": 123, "max_iter": 10000, "solver": "liblinear", "penalty": "l2"} |
| Classification threshold | 0.5 |

**Table S1B. Decision Tree.**

| **Field** | **Details** |
| --- | --- |
| Tuning method | 10-fold grid search optimizing ROC AUC |
| Search grid | max_depth: [3, 5, 10, None]; min_samples_split: [5, 10, 20]; max_features: ['sqrt', None]; ccp_alpha: [0.0, 0.01, 0.1] |
| Best parameters from grid | {"ccp_alpha": 0.0, "max_depth": null, "max_features": "sqrt", "min_samples_split": 20} |
| Final fitted configuration | {"max_depth": null, "min_samples_split": 20, "max_features": "sqrt", "ccp_alpha": 0.0, "random_state": 123} |
| Classification threshold | 0.5 |

**Table S1C. Random Forest.**

| **Field** | **Details** |
| --- | --- |
| Tuning method | 10-fold grid search optimizing ROC AUC |
| Search grid | n_estimators: [50, 100, 150, 200, 250, 300, 350, 400, 450]; max_features: [2, 3] |
| Best parameters from grid | {"max_features": 2, "n_estimators": "150"} |
| Final fitted configuration | {"max_depth": null, "min_samples_split": 2, "max_features": 2, "ccp_alpha": 0.0, "n_estimators": 150, "random_state": 123} |
| Classification threshold | 0.5 |

**Table S1D. XGBoost.**

| **Field** | **Details** |
| --- | --- |
| Tuning method | 10-fold grid search optimizing ROC AUC |
| Search grid | learning_rate: [0.01, 0.1, 0.2]; max_depth: [3, 5, 10]; n_estimators: [50, 100, 200]; subsample: [0.6, 0.8, 1.0] |
| Best parameters from grid | {"learning_rate": 0.1, "max_depth": 3, "n_estimators": 100, "subsample": 1.0} |
| Final fitted configuration | {"max_depth": 3, "n_estimators": 100, "learning_rate": 0.1, "subsample": 1.0, "colsample_bytree": null, "gamma": null, "random_state": 123} |
| Classification threshold | 0.5 |

**Table S1E. LightGBM.**

| **Field** | **Details** |
| --- | --- |
| Tuning method | 10-fold grid search optimizing ROC AUC |
| Search grid | learning_rate: [0.1, 0.2]; num_leaves: [31, 50, 100]; n_estimators: [100]; subsample: [0.6, 0.8, 1.0]; colsample_bytree: [0.6, 0.8, 1.0] |
| Best parameters from grid | {"colsample_bytree": 1.0, "learning_rate": 0.1, "n_estimators": 100, "num_leaves": 31, "subsample": 0.6} |
| Final fitted configuration | {"max_depth": -1, "n_estimators": 100, "learning_rate": 0.1, "subsample": 0.6, "colsample_bytree": 1.0, "num_leaves": 31, "random_state": 123} |
| Classification threshold | 0.5 |

**Table S1F. SVM.**

| **Field** | **Details** |
| --- | --- |
| Tuning method | 10-fold grid search optimizing ROC AUC |
| Search grid | C: [0.1]; kernel: ['linear', 'rbf']; gamma: ['scale', 'auto', 0.01]; degree: [2, 3, 4] |
| Best parameters from grid | {"C": 0.1, "degree": 2, "gamma": 0.01, "kernel": "rbf"} |
| Final fitted configuration | {"C": 0.1, "kernel": "rbf", "gamma": 0.01, "degree": 2, "random_state": 123, "max_iter": -1} |
| Classification threshold | 0.5 |

**Table S1G. ANN.**

| **Field** | **Details** |
| --- | --- |
| Tuning method | 10-fold grid search optimizing ROC AUC |
| Search grid | hidden_layer_sizes: [(25,), (50,), (100,), (10, 10), (50, 50), (100, 100), (50, 50, 50)]; activation: ['relu', 'tanh', 'logistic'] |
| Best parameters from grid | {"activation": "tanh", "hidden_layer_sizes": [100, 100]} |
| Final fitted configuration | {"learning_rate": "constant", "hidden_layer_sizes": [100, 100], "activation": "tanh", "random_state": 123, "max_iter": 500, "solver": "adam"} |
| Classification threshold | 0.5 |

**Table S2. TNM stage distribution among EC cases.**

| **TNM stage** | **n** | **% of EC cases** |
| --- | --- | --- |
| 1 | 47 | 23.7 |
| 2 | 45 | 22.7 |
| 3 | 76 | 38.4 |
| 4 | 30 | 15.2 |

**Table S3. Repeated stratified cross-validation of optimized model configurations (5 folds x 20 repeats).**

| **Model** | **AUC** | **Accuracy** | **Precision** | **Sensitivity** | **Specificity** | **F1** |
| --- | --- | --- | --- | --- | --- | --- |
| Random Forest | 0.984 +/- 0.012 | 0.953 +/- 0.021 | 0.965 +/- 0.030 | 0.927 +/- 0.035 | 0.973 +/- 0.024 | 0.945 +/- 0.024 |
| XGBoost | 0.977 +/- 0.012 | 0.926 +/- 0.025 | 0.959 +/- 0.030 | 0.869 +/- 0.053 | 0.970 +/- 0.023 | 0.911 +/- 0.032 |
| LightGBM | 0.977 +/- 0.012 | 0.930 +/- 0.022 | 0.957 +/- 0.034 | 0.880 +/- 0.047 | 0.968 +/- 0.026 | 0.916 +/- 0.028 |
| Decision Tree | 0.942 +/- 0.028 | 0.916 +/- 0.034 | 0.910 +/- 0.049 | 0.900 +/- 0.057 | 0.928 +/- 0.045 | 0.903 +/- 0.040 |
| ANN | 0.877 +/- 0.037 | 0.803 +/- 0.036 | 0.828 +/- 0.066 | 0.702 +/- 0.084 | 0.881 +/- 0.059 | 0.755 +/- 0.050 |
| SVM | 0.859 +/- 0.033 | 0.564 +/- 0.005 | 0.000 +/- 0.000 | 0.000 +/- 0.000 | 1.000 +/- 0.000 | 0.000 +/- 0.000 |
| Logistic | 0.844 +/- 0.037 | 0.792 +/- 0.040 | 0.793 +/- 0.054 | 0.713 +/- 0.083 | 0.853 +/- 0.048 | 0.748 +/- 0.055 |

Note: Values are from an independent reproducibility re-run (seed 123) and may differ slightly from the corresponding figures reported in the main text.

**Table S4**. Stage-restricted internal sensitivity analyses.

| **Analysis** | **Model** | **n** | **Controls** | **EC cases** | **AUC** | **Accuracy** | **Sensitivity** | **Specificity** | **Note** |
| --- | --- | --- | --- | --- | --- | --- | --- | --- | --- |
| All EC cases vs controls in internal test set | Random Forest | 135 | 76 | 59 | 0.979 | 0.963 | 0.949 | 0.974 | Internal test subset |
| Stage I-II EC cases vs controls in internal test set | Random Forest | 100 | 76 | 24 | 0.993 | 0.970 | 0.958 | 0.974 | Internal test subset |
| Stage III-IV EC cases vs controls in internal test set | Random Forest | 111 | 76 | 35 | 0.970 | 0.964 | 0.943 | 0.974 | Internal test subset |
| Stage I-II EC cases vs controls, repeated CV | Random Forest | 348 | 256 | 92 | 0.990 +/- 0.010 | 0.966 +/- 0.021 | 0.894 +/- 0.069 | 0.991 +/- 0.017 | Repeated CV |
| Stage III-IV EC cases vs controls, repeated CV | Random Forest | 362 | 256 | 106 | 0.981 +/- 0.020 | 0.962 +/- 0.019 | 0.886 +/- 0.061 | 0.993 +/- 0.010 | Repeated CV |

Note: Values are from an independent reproducibility re-run (seed 123) and may differ slightly from the corresponding figures reported in the main text.

**Table S5. Random forest feature-importance checks.**

| **Feature** | **Permutation importance mean AUC decrease** | **Permutation importance SD** | **Mean absolute SHAP value** |
| --- | --- | --- | --- |
| ADA | 0.017 | 0.006 | 0.062 |
| AST | -0.000 | 0.002 | 0.010 |
| CREA | 0.094 | 0.022 | 0.139 |
| K | 0.011 | 0.006 | 0.046 |
| MLR | 0.027 | 0.009 | 0.061 |
| PT | 0.004 | 0.004 | 0.021 |
| SIRI | 0.022 | 0.008 | 0.056 |
| TT | 0.021 | 0.008 | 0.039 |
| UA | 0.024 | 0.010 | 0.062 |
